# Supplementary material for: Booster COVID-19 Vaccines for Immune-Mediated Inflammatory Disease Patients: A Systematic Review and Meta-Analysis of Efficacy and Safety
Source: MDPI journal article supplement (doi:10.3390/vaccines10050668), 2022-04-22
Supplement: s1 [file s1]

## **Supplementary Material Contents**

Table S1: Search strategy

Table S2: Comparison of characteristics of studies included in meta-analysis

Table S3: Quality assessment of included cohort studies using the Joanna Briggs' Institute Critical Appraisal tool

Table S4: Quality assessment of included case series using the Joanna Briggs' Institute Critical Appraisal tool

Table S5: Quality assessment of included randomized-controlled trials using the Joanna Briggs' Institute Critical Appraisal tool

Figure S1: Trim-and-fill funnel plot with imputation of potentially missing studies

Figure S2: Linear regression test of funnel plot asymmetry

Figure S3: Leave-one-out analysis

Figure S4: Rate of seroconversion after administration of a booster dose in non-responders to a primary series of COVID-19 vaccination using the fixed effects model

Figure S5: Rate of seroconversion after administration of a booster dose in non-responders to a primary series of COVID-19 vaccination using the random effects model with Hartung-Knapp adjustment

Figure S6: Identification and exclusion of outliers

**Table S1.** Search strategy.

| Data-base      | Search terms                                                                                                                                                                                                                                                                                                                                                                                                                                                                                                                                                                                                                                                                                                | Re-sults |
|----------------|-------------------------------------------------------------------------------------------------------------------------------------------------------------------------------------------------------------------------------------------------------------------------------------------------------------------------------------------------------------------------------------------------------------------------------------------------------------------------------------------------------------------------------------------------------------------------------------------------------------------------------------------------------------------------------------------------------------|----------|
| PubMed         | (covid OR sars) AND (vacc* OR immunis*) AND (immunodef* or immunosupp* or immunocomp* or autoimmune or autoinflammatory or rheum* or inflammatory bowel or Crohn's or ulcerative or psoria* or ankylosing or spondylitis or spondyloarthritis or multiple sclerosis or lupus or vasculitis or myositis or methotrexate or azathioprine or steroid or janus kinase or rituximab or anti cd20 or mycophenolate or interleukin or csdmard or dmard or tacrolimus or cyclosporin or ocrelizumab or hydroxychloroquine)<br><br>Search limits: 1 January 2021 to 28 February 2022                                                                                                                                 | 3,029    |
| EM-BASE        | (covid OR sars) AND (vacc* OR immunis*) AND (immunodef* OR 'immunodeficiency'/exp OR immunosupp* OR 'immunosuppression'/exp OR immunocomp* OR immunocompromised OR autoimmune OR autoinflammatory OR rheumatic OR (inflammatory AND bowel) OR crohn OR ulcerative OR 'psoriasis'/exp OR (ankylosing AND spondylitis) OR spondyloarthritis OR (multiple AND sclerosis) OR lupus OR vasculitis OR myositis OR methotrexate OR azathioprine OR steroid OR (janus AND kinase) OR rituximab OR (anti AND cd20) OR mycophenolate OR interleukin OR csdmard OR dmard OR tacrolimus OR cyclosporin OR ocrelizumab OR hydroxychloroquine) NOT [medline]/lim<br><br>Search limits: 1 January 2021 to 28 February 2022 | 2,139    |
| CEN-TRAL       | (covid OR sars) AND (vacc* OR immunis*) AND (immunodef* or immunosupp* or immunocomp* or autoimmune or autoinflammatory or rheum* or inflammatory bowel or Crohn's or ulcerative or psoria* or ankylosing or spondylitis or spondyloarthritis or multiple sclerosis or lupus or vasculitis or myositis or methotrexate or azathioprine or steroid or janus kinase or rituximab or anti cd20 or mycophenolate or interleukin or csdmard or dmard or tacrolimus or cyclosporin or ocrelizumab or hydroxychloroquine)<br><br>Search limits: 1 January 2021 to 28 February 2022                                                                                                                                 | 104      |
| Web of Science | (covid OR sars) AND (vacc* OR immunis*) AND (immunodef* or immunosupp* or immunocomp* or autoimmune or autoinflammatory or rheum* or inflammatory bowel or Crohn's or ulcerative or psoria* or ankylosing or spondylitis or spondyloarthritis or multiple sclerosis or lupus or vasculitis or myositis or methotrexate or azathioprine or steroid or janus kinase or rituximab or anti cd20 or mycophenolate or interleukin or csdmard or dmard or tacrolimus or cyclosporin or ocrelizumab or hydroxychloroquine)<br><br>Search limits: 1 January 2021 to 28 February 2022                                                                                                                                 | 2,314    |

**Table S2.** Comparison of characteristics of studies included in meta-analysis.

| Study          | Vaccine type |                 | Diseases |        |       |            |        | Treatment     |                 | Vaccine re-<br>sponse |
|----------------|--------------|-----------------|----------|--------|-------|------------|--------|---------------|-----------------|-----------------------|
|                | mRNA         | Viral<br>vector | RA       | MS     | SLE   | Vasculitis | Others | Anti-<br>CD20 | Other<br>DMARDs | Antibody<br>assessed  |
| Achtnichts     | + (16)       |                 |          | + (16) |       |            |        | + (16)        |                 | Anti-RBD              |
| Jyssum         | + (49)       |                 | + (49)   |        |       |            |        | + (49)        |                 | Anti-RBD              |
| Sidler         | + (32)       |                 |          |        |       |            | + (32) | + (32)        |                 | Anti-S1               |
| Bonelli        | + (28)       | + (27)          |          | + (6)  |       | + (8)      | + (41) | + (55)        |                 | Anti-RBD              |
| Kant           | + (14)       | + (1)           |          |        |       | + (15)     |        | + (15)        |                 | Anti-S1               |
| Simon          | +            | +               | + (30)   |        |       | + (14)     | + (22) | + (33)        | + (33)          | Anti-S1               |
| Felten         | + (10)       |                 | + (9)    |        |       |            | + (1)  | + (10)        |                 | Anti-S1               |
| Speer          | + (21)       |                 |          |        |       | + (21)     |        | + (8)         | + (13)          | Anti-S1               |
| Yang           | +            | +               |          |        |       |            | + (35) | + (8)         | + (27)          | Anti-S1               |
| Connolly       | + (12)       | + (6)           |          | + (1)  | + (1) |            | + (14) |               | + (16)          | Anti-RBD              |
| Schmiedeberg   | + (17)       |                 | + (17)   |        |       |            |        |               | + (17)          | Anti-S1               |
| Assawasaksakul | + (7)        | + (1)           |          |        | + (8) |            |        |               | + (8)           | Anti-RBD              |

Values in parentheses indicate number of patients, where available.

**Table S3.** Quality assessment of included cohort studies using the Joanna Briggs' Institute Critical Appraisal tool.

| Study         | 1  | 2  | 3 | 4 | 5 | 6 | 7 | 8 | 9 | 10 | 11 | Overall |
|---------------|----|----|---|---|---|---|---|---|---|----|----|---------|
| Bonelli       | NA | NA | Y | Y | N | Y | Y | Y | Y | U  | Y  | Include |
| Sidler        | NA | NA | Y | Y | Y | Y | Y | Y | Y | U  | Y  | Include |
| Simon         | NA | NA | Y | Y | Y | Y | Y | Y | Y | NA | Y  | Include |
| Schmiedeberg  | NA | NA | Y | Y | N | Y | Y | Y | Y | NA | Y  | Include |
| Schell        | NA | NA | Y | Y | N | Y | Y | Y | Y | U  | Y  | Include |
| Yang          | NA | NA | Y | Y | Y | Y | Y | Y | Y | U  | Y  | Include |
| Speer         | NA | NA | Y | Y | Y | Y | Y | Y | Y | NA | Y  | Include |
| Hadjadj       | NA | NA | Y | Y | Y | Y | Y | Y | Y | U  | Y  | Include |
| Jyssum        | NA | NA | Y | Y | Y | Y | Y | Y | Y | Y  | Y  | Include |
| Achtnichts    | NA | NA | Y | Y | Y | Y | Y | Y | Y | Y  | Y  | Include |
| Madelon       | NA | NA | Y | Y | Y | Y | Y | Y | Y | NA | Y  | Include |
| Dreyer-Alster | NA | NA | Y | Y | Y | Y | Y | Y | Y | NA | Y  | Include |

|                                                                                                               |
|---------------------------------------------------------------------------------------------------------------|
| Checklist                                                                                                     |
| 1. Were the two groups similar and recruited from the same population?                                        |
| 2. Were the exposures measured similarly to assign people to both exposed and unexposed groups?               |
| 3. Was the exposure measured in a valid and reliable way?                                                     |
| 4. Were confounding factors identified?                                                                       |
| 5. Were strategies to deal with confounding factors stated?                                                   |
| 6. Were the groups/participants free of the outcome at the start of the study (or at the moment of exposure)? |
| 7. Were the outcomes measured in a valid and reliable way?                                                    |
| 8. Was the follow up time reported and sufficient to be long enough for outcomes to occur?                    |
| 9. Was follow up complete, and if not, were the reasons to loss to follow up described and explored?          |
| 10. Were strategies to address incomplete follow up utilized?                                                 |
| 11. Was appropriate statistical analysis used?                                                                |

Legend:

Y – Yes

N – No

U – Unclear

NA – Not applicable

**Table S4.** Quality assessment of included case series using the Joanna Briggs’ Institute Critical Appraisal tool.

| Study          | 1 | 2 | 3 | 4 | 5 | 6 | 7 | 8 | 9 | 10 | Overall |
|----------------|---|---|---|---|---|---|---|---|---|----|---------|
| Connolly       | Y | Y | Y | U | Y | Y | Y | Y | N | NA | Include |
| Assawasaksakul | Y | Y | Y | N | Y | Y | Y | Y | N | NA | Include |
| Felten         | Y | Y | Y | U | Y | Y | Y | Y | N | NA | Include |
| Kant           | Y | Y | Y | N | U | Y | Y | Y | N | NA | Include |

| Checklist                                                                                                        |
|------------------------------------------------------------------------------------------------------------------|
| 1. Were there clear criteria for inclusion in the case series?                                                   |
| 2. Was the condition measured in a standard, reliable way for all participants included in the case series?      |
| 3. Were valid methods used for identification of the condition for all participants included in the case series? |
| 4. Did the case series have consecutive inclusion of participants?                                               |
| 5. Did the case series have complete inclusion of participants?                                                  |
| 6. Was there clear reporting of the demographics of the participants in the study?                               |
| 7. Was there clear reporting of clinical information of the participants?                                        |
| 8. Were the outcomes or follow-up results of cases clearly reported?                                             |
| 9. Was there clear reporting of the presenting sites’/clinics’ demographic information?                          |
| 10. Was statistical analysis appropriate?                                                                        |

Legend:

Y – Yes

N – No

U – Unclear

NA – Not applicable

**Table S5.** Quality assessment of included randomised-controlled trials using the Joanna Briggs' Institute Critical Appraisal tool.

| Study   | 1 | 2 | 3 | 4 | 5 | 6 | 7 | 8 | 9 | 10 | 11 | 12 | 13 | Overall |
|---------|---|---|---|---|---|---|---|---|---|----|----|----|----|---------|
| Mallory | Y | Y | Y | N | Y | Y | Y | Y | Y | Y  | Y  | Y  | Y  | Include |

|                                                                                                                                                                                           |
|-------------------------------------------------------------------------------------------------------------------------------------------------------------------------------------------|
| Checklist                                                                                                                                                                                 |
| 1. Was true randomization used for assignment of participants to treatment groups?                                                                                                        |
| 2. Was allocation to treatment groups concealed?                                                                                                                                          |
| 3. Were treatment groups similar at the baseline?                                                                                                                                         |
| 4. Were participants blind to treatment assignment?                                                                                                                                       |
| 5. Were those delivering treatment blind to treatment assignment?                                                                                                                         |
| 6. Were outcomes assessors blind to treatment assignment?                                                                                                                                 |
| 7. Were treatment groups treated identically other than the intervention of interest?                                                                                                     |
| 8. Was follow up complete and if not, were differences between groups in terms of their follow up adequately described and analyzed?                                                      |
| 9. Were participants analyzed in the groups to which they were randomized?                                                                                                                |
| 10. Were outcomes measured in the same way for treatment groups?                                                                                                                          |
| 11. Were outcomes measured in a reliable way?                                                                                                                                             |
| 12. Was appropriate statistical analysis used?                                                                                                                                            |
| 13. Was the trial design appropriate, and any deviations from the standard RCT design (individual randomization, parallel groups) accounted for in the conduct and analysis of the trial? |

Legend:

Y – Yes

N – No

U – Unclear

NA – Not applicable

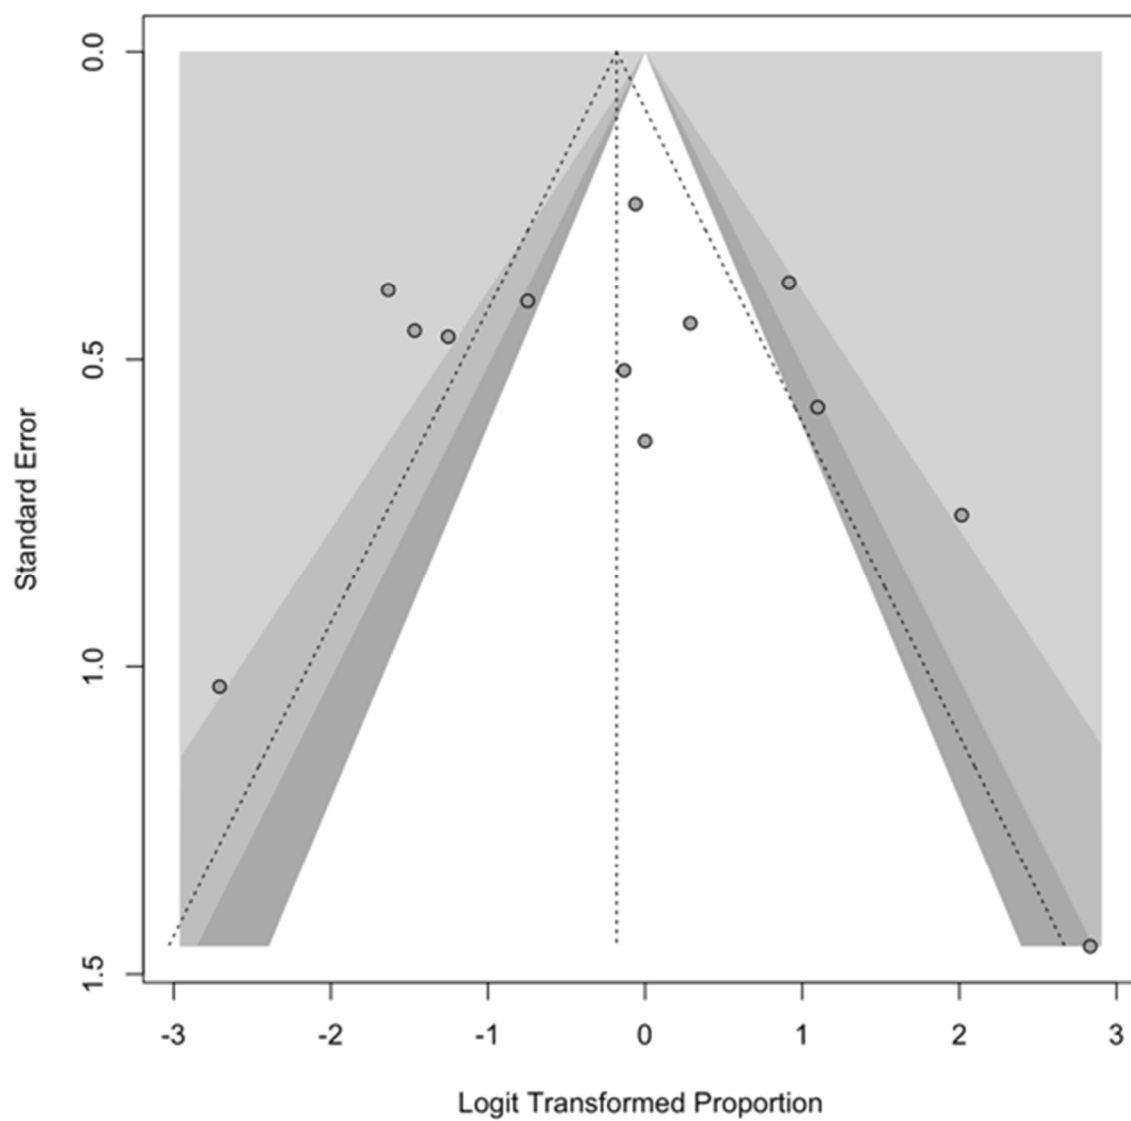

**Figure S1.** Trim-and-fill funnel plot with imputation of potentially missing studies.

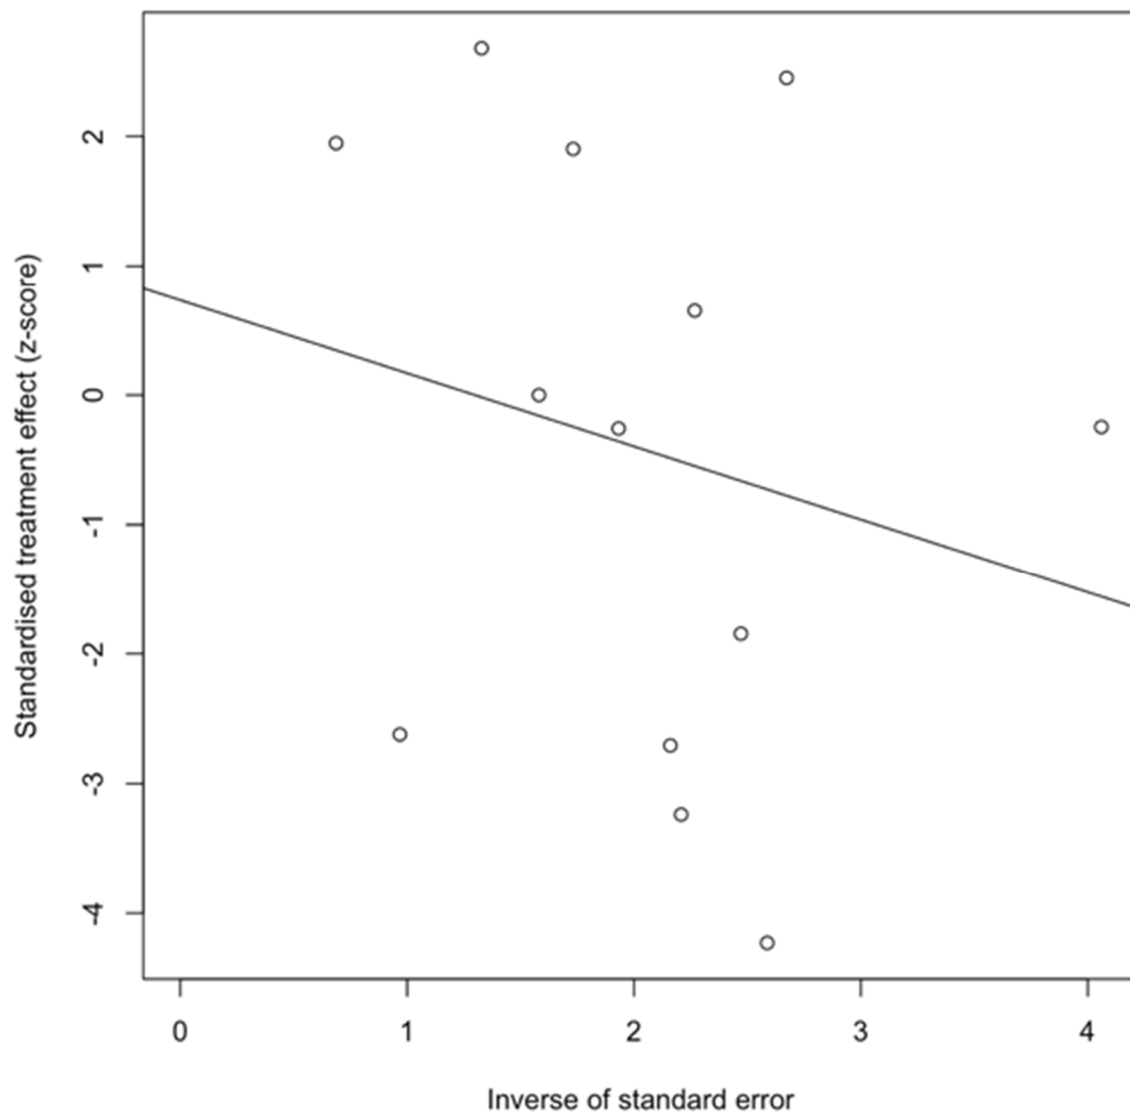

**Figure S2.** Linear regression test of funnel plot asymmetry.

Test result:  $t = 0.42$ ,  $df = 11$ ,  $p\text{-value} = 0.6849$

Sample estimates:

| bias   | se.bias | intercept | se.intercept |
|--------|---------|-----------|--------------|
| 0.7342 | 1.7618  | -0.5650   | 0.7970       |

Details:

- multiplicative residual heterogeneity variance ( $\tau^2 = 5.6292$ )
- predictor: standard error
- weight: inverse variance
- reference: Egger et al. (1997), BMJ



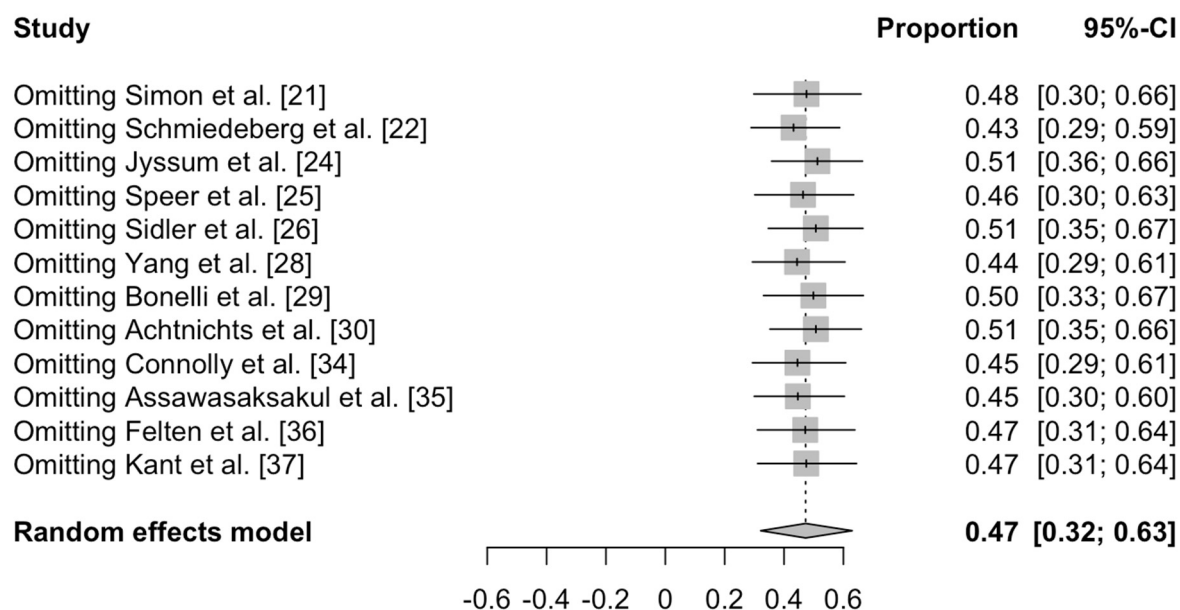

Figure S3. Leave-one-out analysis.

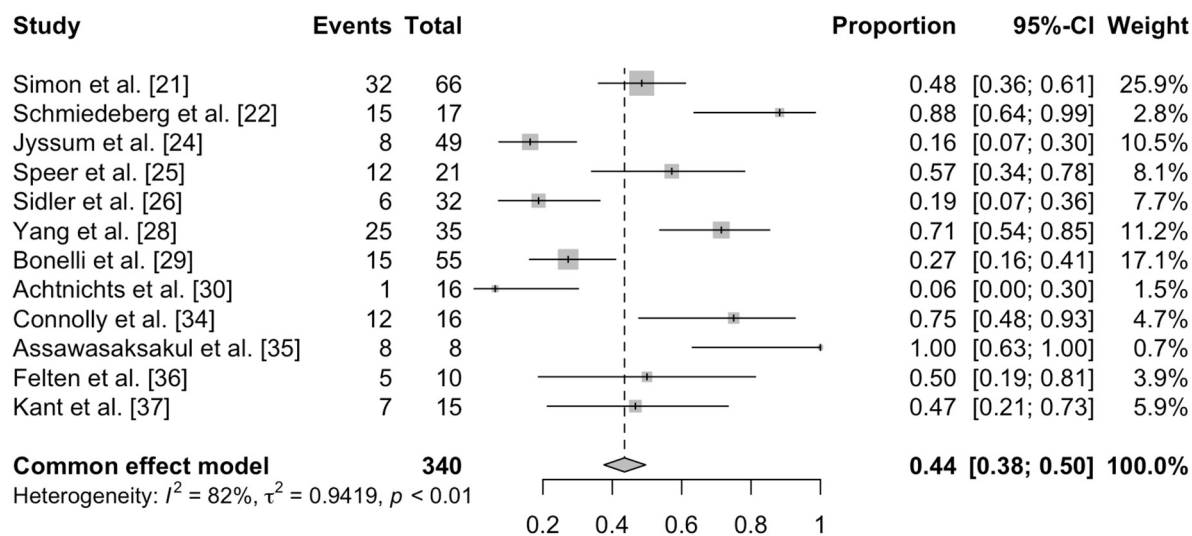

**Figure S4.** Rate of seroconversion after administration of a booster dose in non-responders to a primary series of COVID-19 vaccination using the fixed effects model.

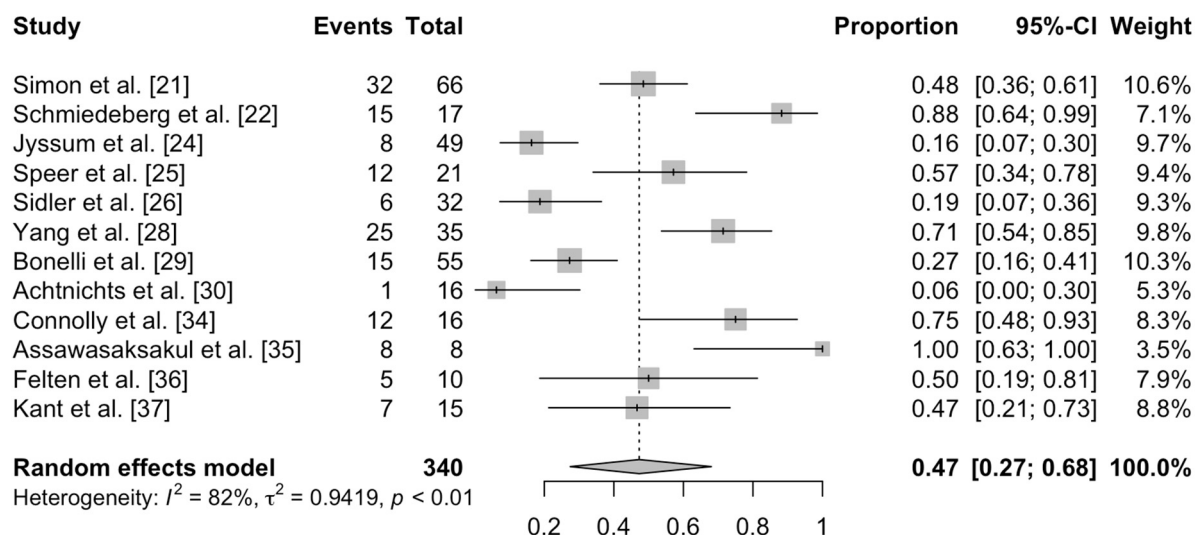

**Figure S5.** Rate of seroconversion after administration of a booster dose in non-responders to a primary series of COVID-19 vaccination using the random effects model with Hartung-Knapp adjustment.

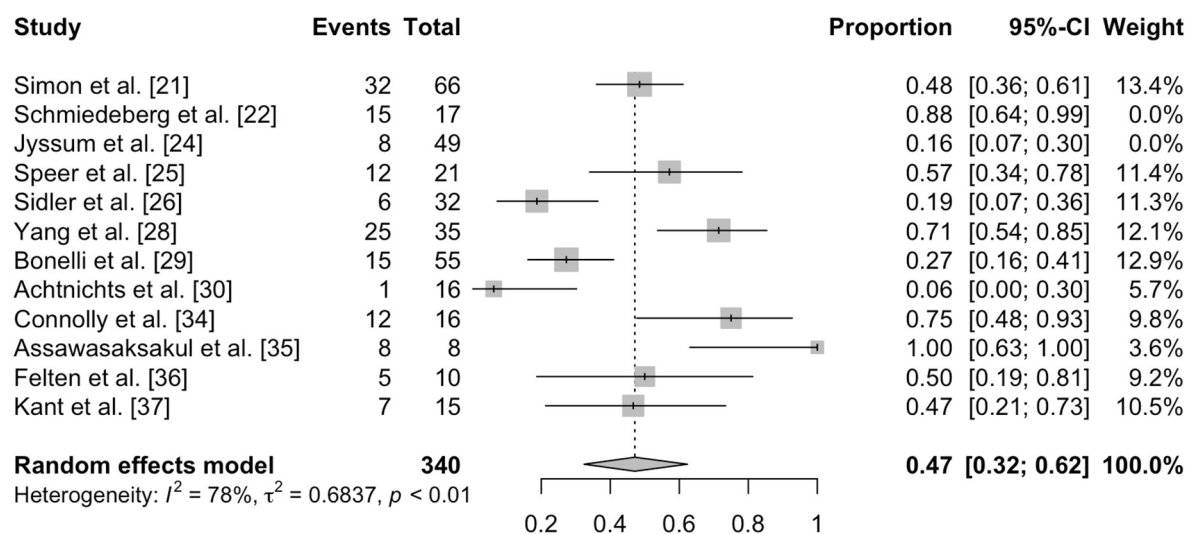

**Figure S6.** Identification and exclusion of outliers.
